# Supplementary material for: MDCK Cystogenesis Driven by Cell Stabilization within Computational Analogues
Source: PLOS journal article supplement (doi:10.1371/journal.pcbi.1002030), 2011-04-07
Supplement: S18 (10.1371/journal.pcbi.1002030.s018) [file journal.pcbi.1002030.s018]

301 Moved Permanently

# Moved Permanently

The document has moved here.

---

Apache Server at www.ploscompbiol.org Port 80
